# Supplementary material for: Continuous transition from antiferroelectric to ferroelectric switching liquid crystalline phases in two homologous series of bent-core mesogenic dimers based on carbosilane spacer units
Source: Royal Society of Chemistry journal article supplement (doi:10.1039/b609555k), 2006-01-01
Supplement: b609555k.pdf [file b609555k.pdf]

## Supporting Information

### Continuous transition from antiferroelectric to ferroelectric switching liquid crystalline phases in two homologous series of bent core mesogenic dimers based on carbosilane spacer units

Christina Keith,<sup>a</sup> R. Amaranatha Reddy,<sup>a</sup> Ute Baumeister,<sup>b</sup> Harald Hahn,<sup>c</sup> Heinrich Lang,<sup>c</sup> and Carsten Tschierske\*<sup>a</sup>

<sup>a</sup> Institute of Organic Chemistry, University Halle, Kurt-Mothes Str. 2, 06120 Halle, Germany. Fax: 045 345 55 27346; Tel: 045 345 5525664; E-mail: carsten.tschierske@chemie.uni-halle.de.

<sup>b</sup> Institute of Physical Chemistry, University Halle, Mühlpforte 1, 06120 Halle, Germany.

<sup>c</sup> Institute of Inorganic Chemistry, TU Chemnitz, Str. der Nationen 62, 09111 Chemnitz, Germany.

#### 1. Additional figures and tables

**Table S1** Transition temperatures and corresponding enthalpy values (values in square brackets) of compounds **2/n** and **3/n**.

| Comp.      | T/°C [ $\Delta H/\text{kJ mol}^{-1}$ ] |           |                                                  |                        |     |
|------------|----------------------------------------|-----------|--------------------------------------------------|------------------------|-----|
| <b>2/2</b> | Cr                                     | 81 [51.2] | SmCP <sub>A</sub>                                | 108 [37.2]             | Iso |
| <b>2/4</b> | Cr                                     | 68 [16.8] | SmCP <sub>F</sub> <sup>[*]</sup>                 | 103 [32.7]             | Iso |
| <b>2/6</b> | Cr                                     | 67 [18.3] | SmCP <sub>F</sub> <sup>[*]</sup>                 | 100 [33.0]             | Iso |
| <b>2/8</b> | Cr                                     | 98 [84.0] | (SmCP <sub>F</sub> <sup>[*]</sup> ) <sup>a</sup> | 95 [33.9] <sup>a</sup> | Iso |
| <b>3/3</b> | Cr                                     | 64 [35.0] | SmCP <sub>A</sub>                                | 105 [33.3]             | Iso |
| <b>3/5</b> | Cr                                     | 68 [29.5] | SmCP <sub>F</sub> <sup>[*]</sup>                 | 97 [34.0]              | Iso |
| <b>3/7</b> | Cr                                     | 57 [16.3] | SmCP <sub>F</sub> <sup>[*]</sup>                 | 98 [33.4]              | Iso |

<sup>a</sup> Monotropic (metastable) LC phase.

**Table S2** Layer spacings as determined by different X-ray diffraction methods (see 2. Conditions for X-ray diffraction)

| Comp. | $T$ (°C) | $d$ (nm)                                  |                                       |         |                                       |
|-------|----------|-------------------------------------------|---------------------------------------|---------|---------------------------------------|
|       |          | Guinier film                              | Guinier goniometer                    | SAX-PSD | 2D detector                           |
| 2/2   | 90 - 50  | 3.80                                      | 3.74                                  |         | 3.74                                  |
| 2/4   | 80       | 4.07                                      |                                       |         |                                       |
|       | 70       | 4.08                                      |                                       |         |                                       |
|       | 60       | 4.09                                      |                                       |         |                                       |
|       | 50       | 4.10                                      |                                       |         |                                       |
| 2/6   | 90 - 60  | 4.53                                      |                                       |         |                                       |
| 2/8   | 98/95    | 4.77 <sup>a,c</sup> , 2.37 <sup>b,c</sup> | 4.84                                  | 4.75    |                                       |
| 3/3   | 90       | 3.97                                      |                                       |         |                                       |
|       | 70       | 3.95                                      |                                       |         |                                       |
|       | 50       | 3.94                                      |                                       |         |                                       |
| 3/5   | 80 - 40  | 4.31                                      |                                       |         |                                       |
| 3/7   | 80 - 60  | 4.84 <sup>a</sup> , 2.42 <sup>b</sup>     | 4.85 <sup>a</sup> , 2.39 <sup>b</sup> | 4.87    | 4.90 <sup>a</sup> , 2.43 <sup>b</sup> |

<sup>a</sup> first order, <sup>b</sup> second order layer reflection, <sup>c</sup> beginning phase transition, photo shows additional reflections from the phase below SmCP<sub>F</sub><sup>[\*]</sup>

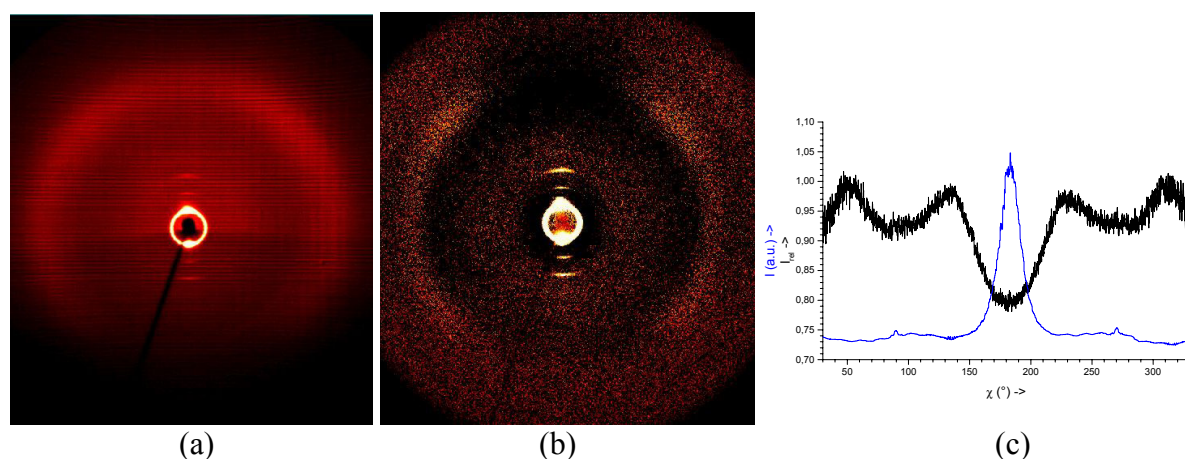

**Fig. S1** 2D X-ray pattern from a partially surface-aligned sample of 2/2 at 90 °C on cooling: a) original pattern, b) scattering of the isotropic liquid subtracted to enhance the effect of the anisotropic distribution of the wide-angle scattering in the SmCP<sub>A</sub> phase, c) distribution of the wide-angle scattering along  $\chi$  (black line) with maxima at  $\chi = 49, 134, 227,$  and  $316^\circ$  in comparison with the  $\chi$  position of the layer reflections (blue line) at  $\chi = 180^\circ$  giving an average tilt angle of the molecules with respect to the layer normal of  $43.5^\circ$  [ $I_{\text{rel}} = I(90^\circ\text{C}) / I(111^\circ\text{C, iso})$ ]

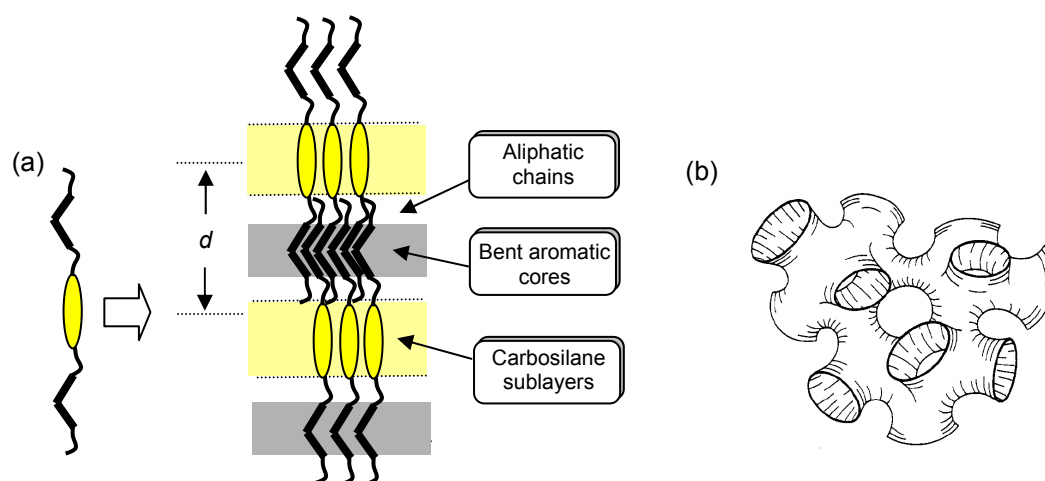

**Fig. S2** (a) Model of the organization of the molecules  $2/n$  and  $3/n$  in the triply segregated smectic phases (the molecules are additionally tilted with respect to the projection plane); (b) shows a model of a sponge phase where a random web of the aromatic layers divides the fluid regions (segregated carbosilane sublayers are not shown).

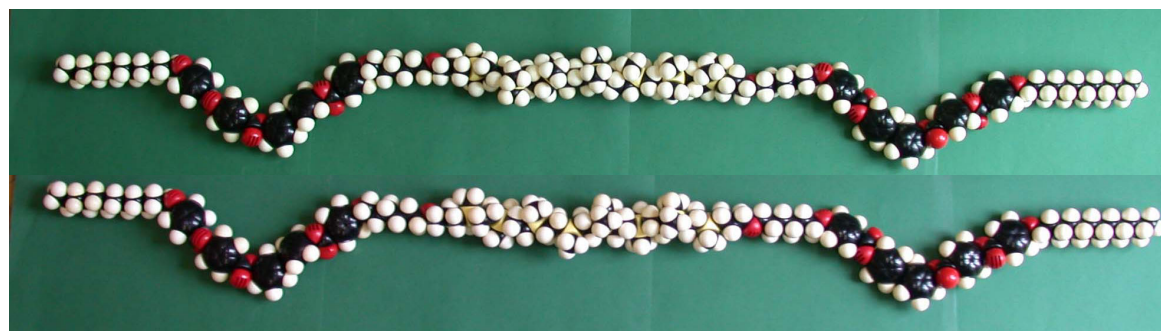

**Fig. S3** Conformation used for the determination of the molecular length; CPK-Models of compounds  $3/7$  (top,  $L = 13.4$ ) and  $2/8$  (bottom,  $L = 13.5$ ) are shown as examples. Though the aromatic cores and the carbosilane spacer units appear to have only a slightly different cross-section in the shown views, it must be considered that the aromatic rings do not have a circular cross section, as seen from a top-view, whereas they are much flatter if seen from the side; in contrast, the carbosilane units have an overall circular average cross section, i.e. the space required by these units is much larger than that of the aromatic parts, as also indicated in Fig. S2a.

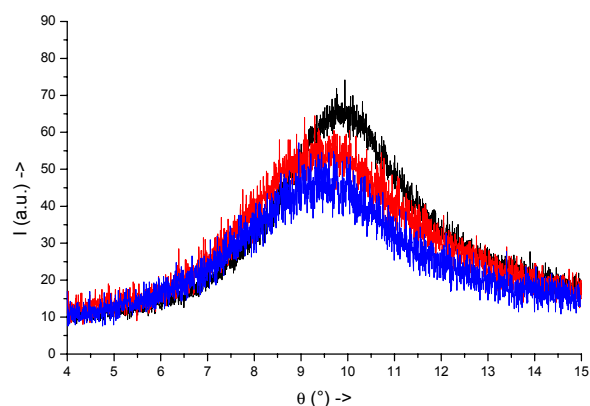

**Fig. S4** Comparison of the wide-angle X-ray scattering from compounds  $2/2$  (black line,  $90^\circ\text{C}$ , maximum at  $\theta = 9.85^\circ$ ),  $2/8$  (blue line,  $95^\circ\text{C}$ , maximum at  $\theta = 9.45^\circ$ ), and  $3/7$  (red line,  $70^\circ\text{C}$ , maximum at  $\theta = 9.62^\circ$ ) measured on cooling with the Guinier goniometer using  $\text{CuK}\alpha$  radiation.

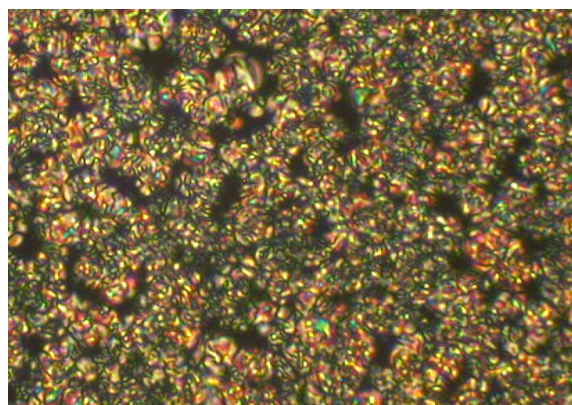

**Fig. S5** Texture of the SmCP<sub>A</sub> phase of compound **3/3** as seen between crossed polarizers at  $T = 104\text{ °C}$  (dark areas are residues of the isotropic liquid).

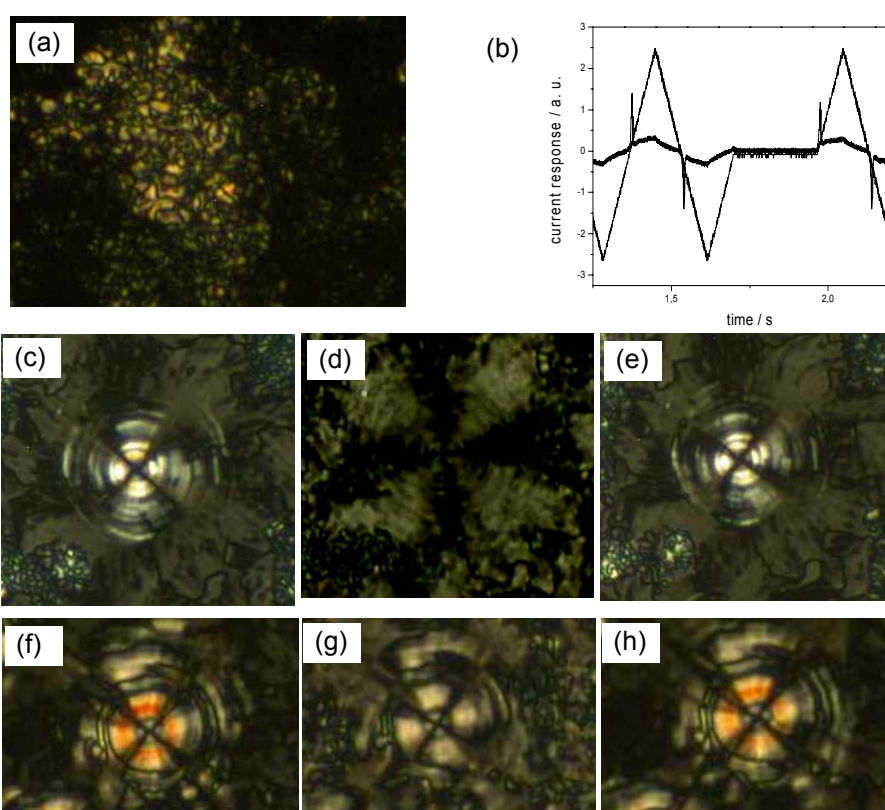

**Fig. S6** Mesophase of compound **2/4**: (a) Texture between crossed polarizers at  $T = 90\text{ °C}$  shows the coexistence of dark and birefringent textures; (b) switching current response obtained under a modified triangular wave field ( $205\text{ V}_{pp}$ ;  $3\text{ Hz}$ .) at  $95\text{ °C}$  indicates a surface stabilized FE switching; (c,f) circular domains as grown under a DC field at  $90\text{ °C}$  ( $+10\text{ V}$ ), (d,g) same areas after switching off the electric field; (e,h) circular domains seen after field reversal ( $-10\text{ V}$ ); both domains, those showing a tristable switching (c-e) and those showing a bistable switching (f-h) coexist in the same sample.

## 2. Conditions for X-ray diffraction

X-ray investigations on powder-like samples kept in glass capillaries ( $\varnothing 1\text{ mm}$ ) in temperature-controlled heating stages were carried out with 1. a Guinier film camera (Huber) using quartz-monochromatized  $\text{CuK}\alpha$  radiation (30 to 60 min exposure time, calibration with the powder pattern of  $\text{Pb}(\text{NO}_3)_2$ ), 2. a Guinier goniometer (Huber) using quartz-

monochromatized CuK $\alpha$  radiation, 3. a modified Kratky camera and a position-sensitive linear detector (MBraun) for the small angle region using Ni-filtered CuK $\alpha$  radiation. 2D patterns for aligned samples on a glass plate on a temperature-controlled heating stage (alignment at the sample – glass or at the sample – air interface) were recorded with a 2D detector (HI-STAR, Siemens) using Ni-filtered CuK $\alpha$  radiation.

### 3. Analytical data of compounds 2/n and 3/n

**2/2**  $^1\text{H-NMR}$  ( $\text{CDCl}_3$ ; 400 MHz):  $\delta$  = 8.28 (d,  $J$  8.7, 4H, Ar-H), 8.14 (d,  $J$  8.9, 4H, Ar-H), 8.13 (d,  $J$  8.9, 4H, Ar-H), 7.63 (d,  $J$  8.7, 4H, Ar-H), 7.49 (d,  $J$  4.9, 4H, Ar-H), 7.43 (s, 2H, Ar-H), 7.36 (d,  $J$  8.9, 4H, Ar-H), 7.26 (d,  $J$  8.5, 4H, Ar-H), 7.20 (m, 2H, Ar-H), 6.97 (d,  $J$  8.9, 4H, Ar-H), 6.96 (d,  $J$  9.1, 4H, Ar-H), 4.04 (m, 8H, OCH $_2$ ), 3.41 (t,  $J$  6.5, 4H, OCH $_2$ ), 3.35 (t,  $J$  7.2, 4H, OCH $_2$ ), 1.82 (m, 8H, OCH $_2$ CH $_2$ ), 1.61 (m, 4H, CH $_2$ OCH $_2$ ), 1.47 (m, 8H, OCH $_2$ CH $_2$ CH $_2$ ), 1.26 (m, 36H, CH $_2$ ), 0.87 (t,  $J$  6.8, 6H, CH $_3$ ), 0.46 (m, 4H, SiCH $_2$ ), 0.36 (s, 4H, SiCH $_2$ ), -0.06 (s, 12H, SiCH $_3$ );  $^{13}\text{C-NMR}$  ( $\text{CDCl}_3$ ; 125 MHz):  $\delta$  = 164.90, 164.48, 164.32, 163.83, 163.55, 155.43, 151.33, 150.85, 142.16, 137.76, 132.42, 132.31, 131.83, 129.84, 128.24, 126.87, 124.68, 122.17, 122.11, 121.50, 120.97, 120.54, 120.41, 114.43, 114.31, 74.03, 70.73, 68.40, 68.22, 31.91, 30.90, 29.75, 29.64, 29.62, 29.58, 29.54, 29.35, 29.33, 29.08, 26.02, 25.97, 29.90, 24.18, 22.68, 14.10, 10.67, 7.12, -3.99;  $^{29}\text{Si-NMR}$  ( $\text{CDCl}_3$ , 99.3 MHz):  $\delta$  = 4.53; Calc. for C $_{114}$ H $_{142}$ O $_{18}$ Si $_2$ : C 73.75, H 7.71; found: C 73.73, H 7.87 %.

**2/4**:  $^1\text{H-NMR}$  ( $\text{CDCl}_3$ ; 400 MHz):  $\delta$  = 8.28 (d,  $J$  8.7, 4H, Ar-H), 8.14 (d,  $J$  8.9, 8H, Ar-H), 7.63 (d,  $J$  8.5, 4H, Ar-H), 7.49 (d,  $J$  4.9, 4H, Ar-H), 7.43 (s, 2H, Ar-H), 7.37 (d,  $J$  8.7, 4H, Ar-H), 7.27 (d,  $J$  8.5, 4H, Ar-H), 7.21 (m, 2H, Ar-H), 6.97 (d,  $J$  8.7, 4H, Ar-H), 6.95 (d,  $J$  8.9, 4H, Ar-H), 4.04 (m, 8H, OCH $_2$ ), 3.42 (t,  $J$  6.5 Hz, 4H, OCH $_2$ ), 3.36 (t,  $J$  7.2, 4H, OCH $_2$ ), 1.83 (m, 8H, OCH $_2$ CH $_2$ ), 1.65-1.45 (m, 20H, CH $_2$ ), 1.35-1.26 (m, 32H, CH $_2$ ), 0.87 (t,  $J$  6.8, 6H, CH $_3$ ), 0.47 (m, 4H, SiCH $_2$ ), 0.35 (s, 8H, SiCH $_2$ ), 0.34 (s, 4H, SiCH $_2$ ), -0.05 (s, 12H, SiCH $_3$ ), -0.08 (s, 12H, SiCH $_3$ );  $^{13}\text{C-NMR}$  ( $\text{CDCl}_3$ ; 125 MHz):  $\delta$  = 164.88, 164.45, 164.29, 163.81, 163.53, 155.40, 151.30, 150.83, 142.14, 137.73, 132.39, 132.28, 131.80, 129.81, 128.42, 128.21, 126.84, 124.65, 122.14, 122.08, 121.47, 120.94, 120.51, 120.39, 115.67, 114.40, 114.28, 24.02, 70.70, 68.37, 68.19, 31.87, 29.72, 29.61, 29.59, 29.54, 29.51, 29.30, 29.05, 25.99, 25.94, 25.88, 25.81, 24.15, 22.64, 14.07, 10.65, 7.13, 6.56, -4.01, -4.49;  $^{29}\text{Si-NMR}$  ( $\text{CDCl}_3$ , 99.3 MHz):  $\delta$  = 5.64, 4.50; Calc. for C $_{122}$ H $_{162}$ O $_{18}$ Si $_4$ : C 72.22, H 8.05 ; found: C 72.39, H 8.08 %.

**2/6**:  $^1\text{H-NMR}$  ( $\text{CDCl}_3$ ; 400 MHz):  $\delta$  = 8.28 (d,  $J$  8.5, 4H, Ar-H), 8.14 (d,  $J$  8.5, 8H, Ar-H), 7.63 (d,  $J$  8.4, 4H, Ar-H), 7.49 (d,  $J$  4.9, 4H, Ar-H), 7.44 (s, 2H, Ar-H), 7.36 (d,  $J$  8.7, 4H, Ar-H), 7.27 (d,  $J$  8.5, 4H, Ar-H), 7.20 (m, 2H, Ar-H), 6.96 (m, 8H, Ar-H), 4.04 (m, 8H, OCH $_2$ ), 3.41 (t,  $J$  6.6, 4H, OCH $_2$ ), 3.35 (t,  $J$  7.1, 4H, OCH $_2$ ), 1.83 (m, 8H, OCH $_2$ CH $_2$ ), 1.62-1.41 (m, 20H, CH $_2$ ), 1.32 (m, 32H, CH $_2$ ), 0.87 (t,  $J$  6.9, 6H, CH $_3$ ), 0.45 (m, 4H, SiCH $_2$ ), 0.35 (s, 8H, Si-CH $_2$ ), 0.35 (s, 8H, Si-CH $_2$ ), 0.34 (s, 12H, Si-CH $_2$ ), -0.06 (s, 12H, Si-CH $_3$ ), -0.08 (s, 24H, Si-CH $_3$ );  $^{13}\text{C-NMR}$  ( $\text{CDCl}_3$ ; 125 MHz):  $\delta$  = 164.90, 164.48, 164.32, 163.84, 163.56, 155.43, 151.33, 150.86, 142.17, 137.76, 132.42, 132.31, 131.83, 129.84, 128.24, 126.87, 124.68, 122.17, 122.13, 121.51, 120.97, 120.55, 120.42, 115.70, 114.43, 114.31, 74.05, 70.73, 68.40, 68.22, 32.65, 31.91, 29.75, 29.64, 29.62, 29.57, 29.54, 29.33, 29.08, 26.03, 25.97, 25.91, 24.19, 22.68, 14.10, 10.68, 7.16, 6.60, -3.97, -4.42, -4.45;  $^{29}\text{Si-NMR}$  ( $\text{CDCl}_3$ , 99.3 MHz):  $\delta$  = 5.61, 4.49; Calc. for C $_{130}$ H $_{182}$ O $_{18}$ Si $_6$ : C 70.93, H 8.33 ; found: C 71.30, H 8.34 %.

**2/8**:  $^1\text{H-NMR}$  ( $\text{CDCl}_3$ ; 400 MHz):  $\delta$  = 8.29 (d,  $J$  8.7, 4H, Ar-H), 8.14 (d,  $J$  8.5, 8H, Ar-H), 7.63 (d,  $J$  8.5, 4H, Ar-H), 7.49 (d,  $J$  4.9, 4H, Ar-H), 7.44 (s, 2H, Ar-H), 7.37 (d,  $J$  8.7, 4H, Ar-H), 7.27 (d,  $J$  8.5, 4H, Ar-H), 7.20 (m, 2H, Ar-H), 6.98 (d,  $J$  8.9, 4H, Ar-H), 6.97 (d,  $J$  8.7,

4H, Ar-H), 4.04 (m, 8H, OCH<sub>2</sub>), 3.41 (t, *J* 6.6, 4H, OCH<sub>2</sub>), 3.35 (t, *J* 7.2, 4H, OCH<sub>2</sub>), 1.83 (m, 8H, OCH<sub>2</sub>CH<sub>2</sub>), 1.61-1.26 (m, 52H, CH<sub>2</sub>), 0.87 (t, *J* 6.9, 6H, CH<sub>3</sub>), 0.47 (m, 4H, SiCH<sub>2</sub>), 0.34 (m, 28H, SiCH<sub>2</sub>), -0.05 (s, 12H, SiCH<sub>3</sub>), -0.08 (s, 36H, SiCH<sub>3</sub>); <sup>13</sup>C-NMR (CDCl<sub>3</sub>; 125 MHz): δ = 164.91, 164.49, 164.33, 163.84, 163.56, 155.44, 151.34, 137.77, 132.42, 132.31, 131.84, 128.24, 122.18, 122.12, 121.51, 120.97, 120.42, 114.43, 114.32, 74.06, 70.74, 68.41, 68.23, 31.91, 29.76, 29.65, 29.63, 29.58, 29.55, 29.34, 29.09, 26.03, 25.97, 25.92, 24.19, 22.68, 14.11, 10.68, 7.17, 6.61, -3.97, -4.42, -4.45; <sup>29</sup>Si-NMR (CDCl<sub>3</sub>, 99.3 MHz): δ = 5.60, 4.49; Calc. for C<sub>144</sub>H<sub>202</sub>O<sub>18</sub>Si<sub>8</sub>: C 70.71, H 8.32 ; found: C 71.14, H 8.62 %.

**3/3:** <sup>1</sup>H-NMR (CDCl<sub>3</sub>; 400 MHz): δ = 8.29 (d, *J* 8.7, 4H, Ar-H), 8.13 (d, *J* 8.7, 8H, Ar-H), 7.63 (d, *J* 8.3, 4H, Ar-H), 7.47 (d, *J* 4.6, 4H, Ar-H), 7.43 (s, 2H, Ar-H), 7.36 (d, *J* 8.3, 4H, Ar-H), 7.27 (d, *J* 8.3, 4H, Ar-H), 7.19 (m, 2H, Ar-H), 6.97 (d, *J* 8.9, 4H, Ar-H), 6.96 (d, *J* 8.9, 4H, Ar-H), 4.04 (m, 8H, OCH<sub>2</sub>), 3.41 (t, *J* 6.6, 4H, CH<sub>2</sub>), 3.35 (t, *J* 7.0 Hz, 2H, CH<sub>2</sub>), 1.81 (m, 8H, CH<sub>2</sub>), 1.59 (m, 4H, CH<sub>2</sub>), 1.44 (m, 16H, CH<sub>2</sub>), 1.31 (m, 40H, CH<sub>2</sub>), 0.87 (t, *J* 6.8, 6H, CH<sub>3</sub>), 0.53 (m, 8H, SiCH<sub>2</sub>), 0.45 (m, 4H, SiCH<sub>2</sub>), -0.05 [s, 12H, Si-(CH<sub>3</sub>)<sub>2</sub>], -0.08 [s, 6H, Si-(CH<sub>3</sub>)<sub>2</sub>]; <sup>13</sup>C-NMR (CDCl<sub>3</sub>; 125 MHz): δ = 164.89, 164.47, 164.31, 163.82, 163.55, 155.42, 151.32, 150.85, 142.15, 137.75, 132.41, 131.83, 129.84, 128.24, 126.86, 124.68, 122.18, 122.11, 121.49, 120.96, 120.54, 120.41, 114.42, 114.30, 74.00, 70.71, 68.39, 68.21, 31.89, 29.74, 29.64, 29.62, 29.57, 29.54, 29.33, 29.07, 26.01, 25.96, 25.89, 24.15, 22.67, 20.10, 19.89, 18.37, 14.10, 11.27, -3.19, -3.36; <sup>29</sup>Si-NMR (CDCl<sub>3</sub>, 99.3 MHz): δ = 2.21, 0.97; Calc. for C<sub>120</sub>H<sub>156</sub>O<sub>18</sub>Si<sub>3</sub>: C 73.13, H 7.98 ; found: C 73.34, H 8.13 %.

**3/5:** <sup>1</sup>H-NMR (CDCl<sub>3</sub>; 400 MHz): δ = 8.28 (d, *J* 8.7, 4H, Ar-H), 8.14 (d, *J* 8.3, 8H, Ar-H), 7.63 (d, *J* 8.7, 4H, Ar-H), 7.49 (d, *J* 4.9, 4H, Ar-H), 7.43 (s, 2H, Ar-H), 7.36 (d, *J* 8.7, 4H, Ar-H), 7.27 (d, *J* 8.7, 4H, Ar-H), 7.20 (m, 2H, Ar-H), 6.97 (d, *J* 8.9, 4H, Ar-H), 6.96 (d, *J* 8.9, 4H, Ar-H), 4.04 (m, 8H, OCH<sub>2</sub>), 3.41 (t, *J* 6.6, 4H, OCH<sub>2</sub>), 3.35 (t, *J* 7.1, 4H, OCH<sub>2</sub>), 1.81 (m, 8H, OCH<sub>2</sub>CH<sub>2</sub>), 1.53-1.47 (m, 12H, CH<sub>2</sub>), 1.26 (m, 44H, CH<sub>2</sub>), 0.87 (t, *J* 6.8, 6H, CH<sub>3</sub>), 0.55 (m, 12H, SiCH<sub>2</sub> CH<sub>2</sub>), 0.53 (m, 4H, SiCH<sub>2</sub>), 0.35 (s, 8H, SiCH<sub>2</sub>), -0.05 (s, 6H, SiCH<sub>3</sub>), -0.07 (s, 12H, SiCH<sub>3</sub>), -0.08 (s, 12H, SiCH<sub>3</sub>); <sup>13</sup>C-NMR (CDCl<sub>3</sub>; 125 MHz): δ = 164.90, 164.48, 164.31, 163.83, 163.56, 155.43, 151.33, 150.86, 142.16, 137.75, 132.41, 132.03, 131.83, 129.83, 128.23, 126.87, 124.67, 122.17, 122.11, 121.50, 120.97, 120.54, 120.41, 114.42, 114.31, 74.02, 70.71, 68.40, 68.22, 31.91, 29.75, 29.64, 29.62, 29.57, 29.54, 29.34, 29.33, 29.08, 26.02, 25.97, 25.90, 24.15, 23.08, 22.68, 20.11, 19.90, 19.84, 18.37, 17.82, 14.1, 11.28, 0.515, -3.19, -3.22, -3.36; <sup>29</sup>Si-NMR (CDCl<sub>3</sub>, 99.3 MHz): δ = 2.21, 1.01; Calc. for C<sub>130</sub>H<sub>180</sub>O<sub>18</sub>Si<sub>5</sub>: C 71.91, H 8.36 ; found: C 72.10, H 8.38 %.

**3/7:** <sup>1</sup>H-NMR (CDCl<sub>3</sub>; 400 MHz): δ = 8.28 (d, *J* 8.9, 4H, Ar-H), 8.14 (d, *J* 8.9, 8H, Ar-H), 7.63 (d, *J* 8.7, 4H, Ar-H), 7.49 (d, *J* 4.9, 4H, Ar-H), 7.43 (s, 2H, Ar-H), 7.36 (d, *J* 8.7, 4H, Ar-H), 7.27 (d, *J* 8.5, 4H, Ar-H), 7.22 (m, 2H, Ar-H), 6.97 (d, *J* 8.9, 4H, Ar-H), 6.96 (d, *J* 8.9, 4H, Ar-H), 4.03 (m, 8H, OCH<sub>2</sub>), 3.41 (t, *J* 6.5, 4H, OCH<sub>2</sub>), 3.35 (t, *J* 7.1, 4H, OCH<sub>2</sub>), 1.81 (m, 8H, OCH<sub>2</sub>CH<sub>2</sub>), 1.56 (m, 8H, CH<sub>2</sub>), 1.48-1.27 (m, 44H, CH<sub>2</sub>), 0.87 (t, *J* 6.8, 6H, CH<sub>3</sub>), 0.55 (m, 24H, SiCH<sub>2</sub> CH<sub>2</sub>), 0.43 (m, 4H, SiCH<sub>2</sub>), -0.05 (s, 12H, SiCH<sub>3</sub>), -0.07 (s, 30H, SiCH<sub>3</sub>); <sup>13</sup>C-NMR (CDCl<sub>3</sub>; 125 MHz): δ = 164.92, 164.49, 164.33, 163.85, 163.57, 155.44, 151.34, 150.87, 142.18, 137.77, 132.43, 132.32, 131.84, 129.85, 128.25, 126.88, 124.69, 122.18, 122.12, 121.51, 120.98, 120.55, 120.42, 114.34, 114.32, 74.03, 70.73, 68.41, 68.23, 31.91, 30.91, 29.76, 29.65, 29.63, 29.58, 29.55, 29.34, 29.09, 26.03, 25.98, 25.92, 24.17, 22.68, 20.15, 19.92, 18.43, 18.38, 14.11, 11.29, -3.18, -3.35; <sup>29</sup>Si-NMR (CDCl<sub>3</sub>, 99.3 MHz): δ = 0.97; Calc. for C<sub>140</sub>H<sub>204</sub>O<sub>18</sub>Si<sub>7</sub>: C 70.90, H 8.67 ; found: C 70.77, H 8.62 %.
